# Supplementary material
Source: PubMed Central journal article supplement (PMC3893240)
Supplement: mabs-5-297-s01.pdf [file mabs-5-297-s01.pdf]

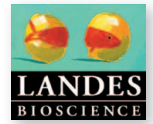

## **Supplemental Material to:**

**Dhaval K. Shah and Alison M. Betts**

**Antibody biodistribution coefficients:  
Inferring tissue concentrations of monoclonal antibodies  
based on the plasma concentrations  
in several preclinical species and human**

**mAbs 2013; 5(2)**

**<http://dx.doi.org/10.4161/mabs.23684>**

**[www.landesbioscience.com/journals/mabs/article/23684](http://www.landesbioscience.com/journals/mabs/article/23684)**

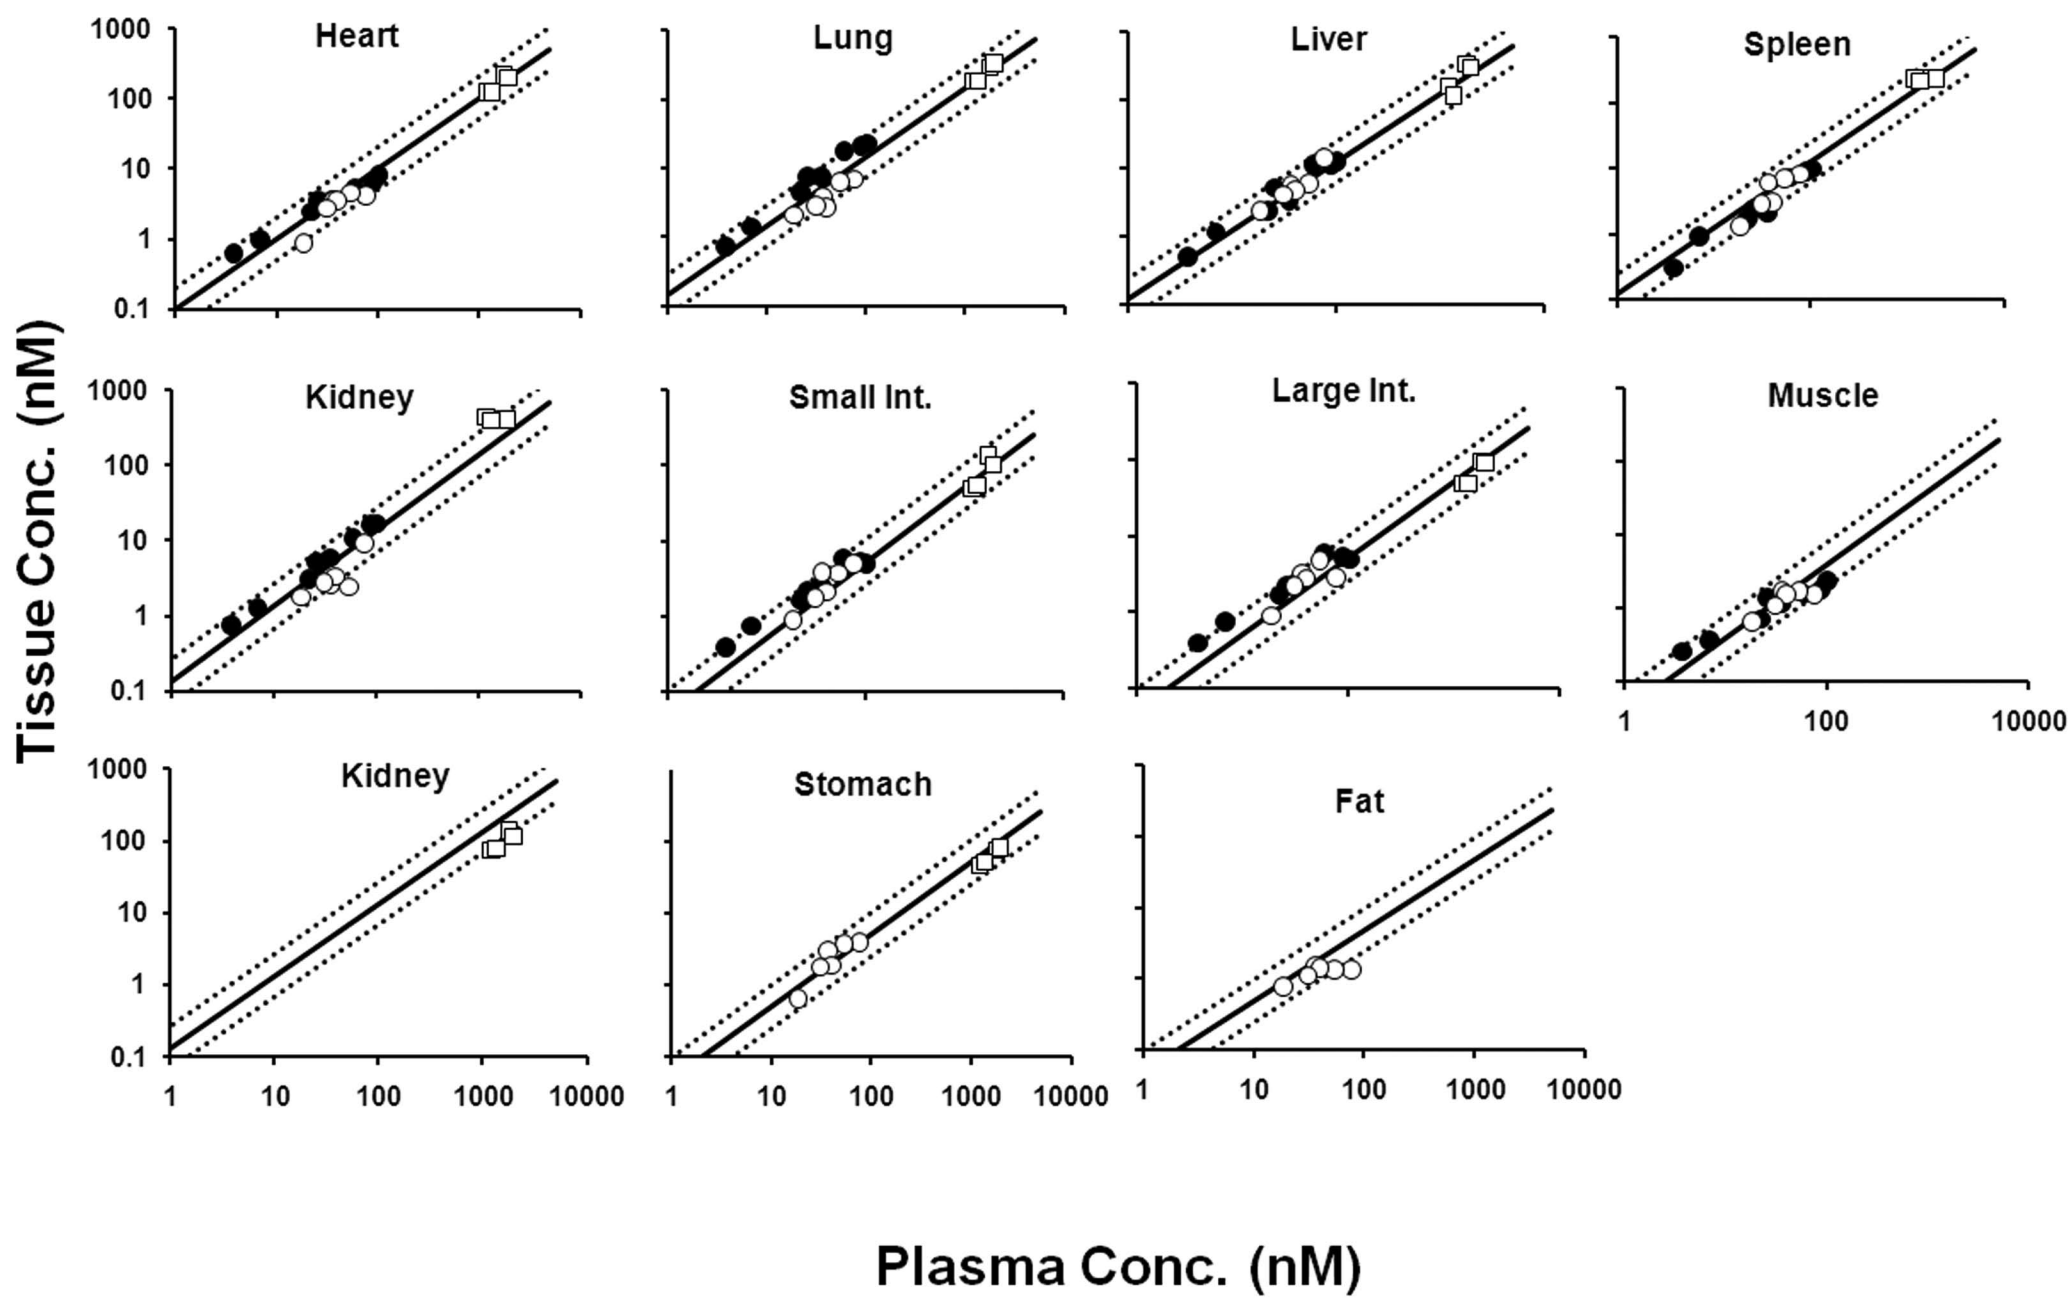

**Figure S1:** The figure displays the tissue vs. plasma ADC concentration profiles generated from two mouse and one rat tissue distribution dataset. Open square represents the observed data for Anti-STEAP1 ADC from a rat tissue distribution study, solid circles represents the observed data for SGN-75 ADC from a mouse tissue distribution study and, open circles represents the observed data for huC242-DM1 ADC from a mouse tissue distribution study. Black solid line represents the profile generated based on the mouse estimated ABC values and black dotted lines around the solid line represent the two fold error envelop.

**Table S1.** References and experimental details thereof, for the mouse training dataset

| Reference                                                        | mAb                                            | Mouse                             | Route | Dose                          | Sampling Time                       | Label  |
|------------------------------------------------------------------|------------------------------------------------|-----------------------------------|-------|-------------------------------|-------------------------------------|--------|
| J Pharmacokinet Pharmacodyn (2007) 34:687–709                    | 7E3 (murine monoclonal IgG1)                   | C57BL/6J WT                       | IV    | 8 mg/kg                       | 1, 2, 6, 12h, 1, 2, 4, 7, 10 days   | I-125  |
| J Pharmacokinet Pharmacodyn (2007) 34:687–709                    | 7E3 (murine monoclonal IgG1)                   | FcRn-knockout mice                | IV    | 8 mg/kg                       | 1, 2, 6, 12 h, 1, 2, 3, 4 days      | I-125  |
| Ph.D. Thesis, Amit Garg, SUNY Buffalo, Chapter-3                 | 7E3 + IVIG (murine monoclonal IgG1)            | C57BL/6J WT                       | IV    | 8 mg/kg                       | 1, 2, 6, 12h, 1, 2, 4, 7, 10 days   | I-125  |
| CANCER RESEARCH 54, 1517-1528. March 15, 1994                    | MOPC21 (Mouse IgG1, kappa monoclonal )         | nu/nu mice with T380 xenografts   | IV    | 3.8 µg/animal                 | 4, 24, 48, 72, 96, 120 h            | In-111 |
| Annals of Biomedical Engineering, Vol. 33, No. 11, November 2005 | cT84.66 (chimeric anti-CEA IgG1)               | nu/nu mice with LS174T xenografts | IV    | 2-3 µCi/animal (15–25 µCi/µg) | 0, 6,13, 24, 48, 72, 96, 120, 168 h | I-131  |
| AAPS-NBC _Poster W3103                                           | 1B1.3a (Rat anti-mouse IL10R mAb)              | WT                                | IV    | 0.5 mg/kg                     | 1, 24, 72, 120, 168 h               | I-125  |
| International Immunopharmacology (2008) 8, 477–483               | IMA-638, anti-IL-13 antibody (humanized IgG1)  | A/J                               | IV    | 1 mg/kg                       | 1, 24, 168, 336 h                   | I-125  |
| International Immunopharmacology (2008) 8, 477–483               | IMA-638, anti-IL-13 antibody (humanized IgG1)  | A/J                               | SC    | 1 mg/kg                       | 1, 24, 168, 336 h                   | I-125  |
| JOURNAL OF PHARMACEUTICAL SCIENCES, VOL. 99, NO. 2, FEBUARY 2010 | anti-Abeta, AAB-003 (humanized IgG1,kappa mAb) | PSAPP Tg+                         | IV    | 10 mg/kg                      | 48, 168, 336, 504, 1032 h           | I-125  |
| JOURNAL OF PHARMACEUTICAL SCIENCES, VOL. 99, NO. 2, FEBUARY 2010 | anti-Abeta, AAB-003 (humanized IgG1,kappa mAb) | PSAPP Tg- (wild-type)             | IV    | 10 mg/kg                      | 48, 168, 336, 504, 1032 h           | I-125  |
| JOURNAL OF PHARMACEUTICAL SCIENCES, VOL. 99, NO. 2, FEBUARY 2010 | Anti IL-21R, ATR-107 (human IgG1,lambda mAb)   | IL-21R/- MICE                     | IV    | 2.5 mg/kg                     | 1, 48, 168, 336, 480, 864 h         | I-125  |

|                                                                   |                                               |                      |        |           |                                                   |       |
|-------------------------------------------------------------------|-----------------------------------------------|----------------------|--------|-----------|---------------------------------------------------|-------|
| JOURNAL OF PHARMACEUTICAL SCIENCES, VOL. 99, NO. 2, FEBRUARY 2010 | Anti IL-21R, ATR-107 (human IgG1,lambda mAb)  | C57BL/6 Mice         | IV     | 2.5 mg/kg | 1, 48, 168, 336, 480, 864 h                       | I-125 |
| MAbs. 2010 Sep-Oct; 2(5): 571–575/JPS VOL. 99, NO. 2              | RAS-111, anti-RAGE (humanized IgG1,kappa mAb) | RAGE KO mice         | IV     | 5 mg/kg   | 1, 24, 48, 144, 336, 648, 984, 1488, 2328, 3168 h | I-125 |
| MAbs. 2010 Sep-Oct; 2(5): 571–575/JPS VOL. 99, NO. 2              | RAS-111, anti-RAGE (humanized IgG1,kappa mAb) | 129S5/SvEv wild-type | IV     | 5 mg/kg   | 1, 24, 48, 144, 336, 648, 984, 1488, 2328, 3168 h | I-125 |
| AAPS J. 2009 September; 11(3): 553–557.                           | 7E3 (murine monoclonal IgG1)                  | C57BL/6J WT          | IV     | 8 mg/kg   | 1, 2, 6, 12h, 1, 2, 4, 7, 10 days                 | I-125 |
| AAPS J. 2009 September; 11(3): 553–557.                           | 7E3 (murine monoclonal IgG1)                  | FcRn-knockout mice   | IV     | 8 mg/kg   | 1, 2, 6, 12 h, 1, 2, 3, 4 days                    | I-125 |
| 7 In-House studies                                                | Various                                       | Various              | IV, IP | Diverse   | Multiple                                          | I-125 |

**Table S2.** References and experimental details thereof, for the mouse validation dataset

| Reference                                                         | mAb                                                     | Mouse                                 | Route | Dose               | Sampling Time                   | Label         |
|-------------------------------------------------------------------|---------------------------------------------------------|---------------------------------------|-------|--------------------|---------------------------------|---------------|
| JPET 330:932–938, 2009                                            | SGN-75 (h1F6 C4v2-mc-MMAF ADC, humanized anti-CD70 mAb) | Nude Mice with 786-O xenografts       | IV    | 1.5 mg/kg          | 1, 4, 8, 24, 48, 96, 168, 240 h | 3-H           |
| Current Pharmaceutical Design, 2009, 15, 988-1007                 | hAFP31 (humanized IgG)                                  | BALB/C mice                           | IV    | ~0.7 mg/kg         | 4, 24, 48, 72, 120, 168, 240 h  | In-111        |
| Clin Cancer Res; 17(24) December 15, 2011                         | R1507, anti-IGF-1R antibody (fully human mAb)           | BALB/c nude mice with OS-1 xenografts | IV    | 3 or 300 µg/animal | 1, 3, 7 Days                    | In-111, I-125 |
| Clin Cancer Res; 17(24) December 15, 2011                         | R1507, anti-IGF-1R antibody (fully human mAb)           | BALB/c nude mice with EW-5 xenografts | IV    | 3 or 300 µg/animal | 1, 3, 7 Days                    | In-111, I-125 |
| The AAPS Journal (2012) DOI: 10.1208/s12248-012-9357-2            | T84.66 (murine IgG1)                                    | SCID + LS174T Xenograft               | IV    | 10 mg/kg           | 1, 3, 8 h, 1, 2, 4, 7, 10 Days  | I-125         |
| The AAPS Journal (2012) DOI: 10.1208/s12248-012-9357-2            | T84.66 + Bevacizumab (murine IgG1)                      | SCID + LS174T Xenograft               | IV    | 10 mg/kg           | 1, 3, 8 h, 1, 2, 4, 7, 10 Days  | I-125         |
| Clin Cancer Res 2005;11(20) October 15, 2005                      | 14C5 (anti–integrin beta1 murine IgG1)                  | NMRImicewith out tumor                | IV    | ~5 µg/animal       | 1, 6, 24, and 48 h              | I-131         |
| Clin Cancer Res 2005;11(20) October 15, 2005                      | 14C5 (anti–integrin beta1 murine IgG1)                  | athymic mice with A549 xenografts     | IV    | ~5 µg/animal       | 1, 6, 24, and 48 h              | I-131         |
| Clin Cancer Res 2005;11(20) October 15, 2005                      | 14C5 (anti–integrin beta1 murine IgG1)                  | athymic mice with LoVo xenografts     | IV    | ~5 µg/animal       | 1, 6, 24, and 48 h              | I-131         |
| THE JOURNAL OF NUCLEAR MEDICINE , Vol. 52 , No. 10 , October 2011 | hRS7, anti-EGP-1(TROP2) (humanized mAb)                 | BALB/c nude mice with PC3 xenografts  | IV    | 5 µg/animal        | Day 3                           | In-111        |
| THE JOURNAL OF NUCLEAR MEDICINE , Vol. 52 , No. 10 , October 2011 | hRS7, anti-EGP-1(TROP2) (humanized mAb)                 | BALB/c nude mice with PC3 xenografts  | IV    | 0.1-100 µg/animal  | Day 4                           | I-125         |

|                                                                              |                                                     |                                                 |    |                     |                                    |                     |
|------------------------------------------------------------------------------|-----------------------------------------------------|-------------------------------------------------|----|---------------------|------------------------------------|---------------------|
| THE JOURNAL OF NUCLEAR MEDICINE ,<br>Vol. 52 , No. 10 , October 2011         | hRS7, anti-EGP-1(TROP2)<br>(humanized mAb)          | BALB/c nude<br>mice with PC3<br>xenografts      | IV | 20<br>µg/anim<br>al | 1, 3, 7 Days                       | 89-ZR               |
| THE JOURNAL OF NUCLEAR MEDICINE ,<br>Vol. 52 , No. 10 , October 2011         | hLL2, anti-CD22 (humanized<br>mAb)                  | BALB/c nude<br>mice with PC3<br>xenografts      | IV | 10<br>µg/anim<br>al | 1, 3, 7 Days                       | 89-ZR               |
| BRAZILIAN ARC. BIOLOGY &<br>TECHNOLOGY, Vol.48, Special : 69-72,<br>Oct 2005 | Anti-CD20 (mouse-human<br>chimera)                  | Swiss WT mice                                   | IV | 3 µg/kg             | 1, 4, 24 h                         | I-131               |
| Cell Biophysics, Volume 26, 1995, 167-<br>182                                | rMAb-425, Anti-hEGFR<br>(murine mAb)                | Athymic mice<br>with breast<br>carcinoma        | IV | 1 mg/kg             | 0.083, 1, 8, 24, 48, 144,<br>432 h | I-125               |
| Nuclear Medicine and Biology 31 (2004)<br>909–919                            | L8A4, Anti-EGFRvIII antibody<br>(murine IgG1)       | BALB/c nu/nu<br>mice with D-<br>256 xenograft   | IV | 3<br>µg/anim<br>al  | 0.5, 1, 2, 4, 24 h                 | [131I]<br>SIP<br>MB |
| Nuclear Medicine and Biology 31 (2004)<br>909–919                            | L8A4, Anti-EGFRvIII antibody<br>(murine IgG1)       | BALB/c nu/nu<br>mice with D-<br>256 xenograft   | IV | 3<br>µg/anim<br>al  | 0.5, 1, 2, 4, 24 h                 | [125I]<br>SGM<br>IB |
| JPET 308:1073–1082, 2004                                                     | huC242 (Anti-MUC1)<br>(humanized mAb)               | Female CD-1<br>mice                             | IV | 1 mg/kg             | 2, 8, 24, 48, 96, 192 h            | I-125               |
| JPET 308:1073–1082, 2004                                                     | huC242-DM1 (ADC)<br>(humanized mAb)                 | Female CD-1<br>mice                             | IV | 1 mg/kg             | 2, 8, 24, 48, 96, 192 h            | I-125               |
| CANCER BIOTHERAPY &<br>RADIOPHARMACEUTICALS Vol 17,<br>Number 4, 2002        | Parental and Biotinylated<br>chTNT-1 Mabs (chimera) | Nude mice<br>with LS174T<br>xenografts          | IV | 0.01<br>mg/kg       | 1,3, or 5 Day                      | I-125               |
| CANCER BIOTHERAPY &<br>RADIOPHARMACEUTICALS Vol 17,<br>Number 4, 2002        | Parental and Biotinylated<br>chTNT-2 Mabs (chimera) | BALB/c mice<br>with<br>Madison109<br>xenografts | IV | 0.01<br>mg/kg       | 1,3, or 5 Day                      | I-125               |
| CANCER BIOTHERAPY &<br>RADIOPHARMACEUTICALS Vol 17,<br>Number 4, 2002        | Parental and Biotinylated<br>chTNT-3 Mabs (chimera) | Nude mice<br>with LS174T<br>xenografts          | IV | 0.01<br>mg/kg       | 1,3, or 5 Day                      | I-125               |

**Table S3.** References and experimental details thereof, for the rat validation dataset

| Reference                                                      | mAb                                                       | Rat                              | Route | Dose           | Sampling Time                          | Label        |
|----------------------------------------------------------------|-----------------------------------------------------------|----------------------------------|-------|----------------|----------------------------------------|--------------|
| Bioconjug Chem. 2011 Oct 19;22(10):1994-2004. Epub 2011 Oct 3. | Anti-STEAP1 antibody (humanized IgG1)                     | Sprague-Dawley rats              | IV    | 10 mg/kg       | 24, 120 h                              | In-111       |
| Bioconjug Chem. 2011 Oct 19;22(10):1994-2004. Epub 2011 Oct 3. | Thio-anti-STEAP1 (ThioMab) (humanized IgG1)               | Sprague-Dawley rats              | IV    | 10 mg/kg       | 24, 120 h                              | In-111       |
| Bioconjug Chem. 2011 Oct 19;22(10):1994-2004. Epub 2011 Oct 3. | Anti-STEAP1-vc-MMAE conjugate (ADC) (humanized IgG1)      | Sprague-Dawley rats              | IV    | 10 mg/kg       | 24, 120 h                              | In-111       |
| Bioconjug Chem. 2011 Oct 19;22(10):1994-2004. Epub 2011 Oct 3. | Thio-anti-STEAP1-vc-MMAE conjugate (TDC) (humanized IgG1) | Sprague-Dawley rats              | IV    | 10 mg/kg       | 24, 120 h                              | In-111       |
| International Immunopharmacology (2008) 8, 477–483             | IMA-026, anti-IL-13 antibody (humanized IgG1, kappa)      | Sprague–Dawley rats              | IV    | 2 mg/kg        | 1, 48, 168, 336, 840 h                 | I-125        |
| The Journal of Nuclear Medicine, Vol. 32 , No. 3 , March 1991  | Mab 3A5, Control (murine)                                 | Wistar rats                      | IV    | 1, 2 µg/animal | 16 h                                   | In-111       |
| Am J Physiol Lung Cell Mol Physiol 280:L1335-L1347, 2001.      | 5F1, Control (murine)                                     | Sprague-Dawley rats              | IV    | 1 µg/animal    | 2 h                                    | I-125        |
| Cell Biophysics, Volume 26, 1995, 167-182                      | rMAb-425, Anti-hEGFR (Human IgG1 mAb)                     | Wistar rats                      | IV    | 1 mg/kg        | 1, 8, 24, 48, 120 h                    | I-125        |
| JPET 339:519–529, 2011                                         | Anti-LINGO-1 Li81 antibody (Human IgG1 mAb)               | Sprague Dawley rats              | IV    | 2 mg/kg        | 1, 6, 24, 48, 96, 168, 216, 264, 336 h | -NA- (ELISA) |
| Journal of Immunotherapy, 16: 251-261                          | Control IgG (Mouse IgG1)                                  | BD IX Rat with K12/TRb Xenograft | IV    | 2 µg/animal    | 2, 4, 7 Days                           | I-125        |
| Journal of Immunotherapy, 16: 251-261                          | CC49, anti-TAG-72 (Mouse IgG1)                            | BD IX Rat with K12/TRb Xenograft | IV    | 2 µg/animal    | 2, 4, 7 Days                           | I-125        |
| Journal of Immunotherapy, 16: 251-261                          | B72.3, anti-TAG-72 (Mouse IgG1)                           | BD IX Rat with K12/TRb Xenograft | IV    | 2 µg/animal    | 2, 4, 7 Days                           | I-125        |



|                                                        |                                       |                                   |    |              |                                          |       |
|--------------------------------------------------------|---------------------------------------|-----------------------------------|----|--------------|------------------------------------------|-------|
| TheJournalof NuclearMedicine Vol.32,<br>No.7, July1991 | Anti-CEA Mab (Mab-35)<br>(Mouse IgG1) | normal<br>female rats<br>(OFA-SD) | IV | 20 µg/animal | 1, 4, 8, 12, 24,<br>48, 72, 96, 144<br>h | I-131 |
| TheJournalof NuclearMedicine Vol.32,<br>No.7, July1991 | Anti-CEA Mab (Chimeric mAb)           | normal<br>female rats<br>(OFA-SD) | IV | 20 µg/animal | 1, 4, 8, 12, 24,<br>48, 72, 96, 144<br>h | I-125 |

**Table S4.** References and experimental details thereof, for the monkey and human validation dataset

| Reference                                             | mAb                                                      | Monkey/<br>Patient                    | Route | Dose         | Sampling<br>Time | Label           |
|-------------------------------------------------------|----------------------------------------------------------|---------------------------------------|-------|--------------|------------------|-----------------|
| Cell Biophysics, Volume 26, 1995, 167-182             | rMAb-425, Anti-hEGFR<br>(Human IgG1 mAb)                 | Cynomolgus<br>monkey                  | IV    | 1 mg/kg      | 24 h             | I-125           |
| Blood, Vol78, No 7 (October I)1,9 91: pp<br>1864-1874 | DT & 1A14 (Control mAbs)<br>(Murine IgG1 & Murine IgG2a) | Juvenile male<br>Mnemestrina          | IV    | 0.5 mg/kg    | 45 h             | I-125           |
| In-House                                              | Confidential                                             | Cynomolgus<br>monkeys                 | IV    | Confidential | Confidential     | I-125           |
| Cancer Res 1993;53:5413-5418.                         | MOv18 (Chimeric IgG1)                                    | Epithelial ovarian<br>cancer patients | IV    | 1 mg/Patient | 48, 144 h        | I-131,<br>I-125 |
